# Supplementary material for: Short-term acclimation in adults does not predict offspring acclimation potential to hypoxia
Source: PubMed Central journal article supplement (PMC5816618; doi:10.1038/s41598-018-21490-y), 2018-02-16
Supplement: 41598_2018_21490_MOESM1_ESM.pdf [file 41598_2018_21490_MOESM1_ESM.pdf]

1 **Supplementary information for: Short-term acclimation in adults does not predict offspring acclimation potential to hypoxia**

2

3 Manuela Truebano\*, Oliver Tills, Michael Collins, Charlotte Clarke, Emma Shippides, Charlotte Wheatley, John I. Spicer

4

5 **Table S1.** Annotation and expression data of ten differentially expressed genes putatively identified as haemocyanin using the most significant  
6 match (lowest E-value) generated by BLAST searches (BlastP and BlastX) against the UniProt/Swissprot database. Gene expression data for  
7 each of the hemocyanin genes are presented as TMM-normalised transcripts per million (TPM). Log-2 fold changes (FC) and associated  
8 probability (adjusted P-value, P<sub>adj</sub>) are also shown.

9

| Contig        | Annotation | Accession number | Identity (%) | E-Value | Gene expression (TPM) |        |        |       |        |        | Log <sub>2</sub> FC | P <sub>adj</sub> |
|---------------|------------|------------------|--------------|---------|-----------------------|--------|--------|-------|--------|--------|---------------------|------------------|
|               |            |                  |              |         | 100%_1                | 100%_2 | 100%_3 | 40%_1 | 40%_2  | 40%_3  |                     |                  |
| DN65240_c0_g2 | HCY_PALVU  | P80888           | 62.25        | 0       | 0.38                  | 0.14   | 0.03   | 0.51  | 5.40   | 2.974  | 3.91                | 1.34e-04         |
| DN68344_c0_g5 | HCY_PALVU  | P80888           | 76.98        | 3e-165  | 2.26                  | 2.30   | 1.52   | 5.64  | 50.33  | 31.29  | 3.89                | 7.85e-08         |
| DN69931_c0_g7 | HCY_PALVU  | P80888           | 55.48        | 2e-118  | 6.71                  | 5.86   | 2.77   | 21.01 | 180.21 | 114.21 | 4.38                | 1.27e-09         |
| DN69931_c0_g8 | HCY_PALVU  | P80888           | 52.68        | 5e-76   | 4.43                  | 3.61   | 1.51   | 15.79 | 108.97 | 65.65  | 4.36                | 1.19e-09         |
| DN70919_c0_g2 | HCYA_APHSP | P14750           | 44.75        | 4e-88   | 11.65                 | 9.11   | 3.33   | 2.74  | 2.25   | 1.54   | -1.59               | 2.30e-02         |
| DN65240_c0_g1 | HCYA_PANIN | P04254           | 62.46        | 0       | 0.12                  | 0.44   | 0.00   | 1.18  | 4.81   | 2.88   | 3.94                | 8.35e-05         |
| DN69931_c0_g3 | HCYA_PANIN | P04254           | 58.70        | 4e-13   | 20.22                 | 26.08  | 14.54  | 77.74 | 468.65 | 296.78 | 3.88                | 1.38e-09         |
| DN69931_c0_g4 | HCYB_ASTLP | P83180           | 62.50        | 2e-09   | 7.50                  | 3.20   | 7.19   | 22.26 | 130.92 | 86.11  | 3.81                | 9.41e-07         |
| DN69931_c0_g6 | HCYB_ASTLP | P83180           | 57.50        | 3e-08   | 0.00                  | 0.30   | 0.00   | 0.15  | 7.60   | 4.42   | 4.79                | 7.23e-03         |
| DN68344_c0_g1 | HCYB_PANIN | P10787           | 60.67        | 3e-30   | 0.87                  | 3.83   | 2.24   | 8.24  | 20.17  | 12.21  | 2.77                | 4.29e-03         |

11 **Table S2.** Results of two-way ANOVA for the effects of life cycle stage, O<sub>2</sub> regime  
 12 (normoxia-100 % air saturation, hypoxia- 40 % air saturation) and their interaction on mass  
 13 specific rates of O<sub>2</sub> uptake and critical O<sub>2</sub> tension (P<sub>c</sub>).

| Response              | Factor                 | df | Sum Sq | Mean Sq | F-value | P-value |
|-----------------------|------------------------|----|--------|---------|---------|---------|
| O <sub>2</sub> uptake | Life cycle stage       | 2  | 13.336 | 6.668   | 41.67   | <0.001  |
|                       | O <sub>2</sub> regime  | 1  | 0.136  | 0.136   | 0.85    | 0.365   |
|                       | Stage x O <sub>2</sub> | 2  | 1.364  | 0.682   | 4.26    | 0.026   |
|                       | Residuals              | 25 | 4.000  | 0.160   |         |         |
| P <sub>c</sub>        | Life cycle stage       | 2  | 35.13  | 17.56   | 23.58   | <0.001  |
|                       | O <sub>2</sub> regime  | 1  | 8.83   | 8.833   | 11.86   | 0.002   |
|                       | Stage x O <sub>2</sub> | 2  | 23.49  | 11.745  | 15.77   | <0.001  |
|                       | Residuals              | 25 | 18.62  | 0.745   |         |         |

15 **Table S3.** Overview of the different variables measured in each generation and life-cycle  
 16 stage. All measurements were taken in individuals exposed to normoxia (100 % air  
 17 saturation) or hypoxia (40 % air saturation)

| Generatio<br>n                   | Life- cycle<br>stage | Exposure time                                                  | Measurements taken                                                                                                     |
|----------------------------------|----------------------|----------------------------------------------------------------|------------------------------------------------------------------------------------------------------------------------|
| F <sub>0</sub>                   | Adult                | One week                                                       | RMR<br>Heart rate<br>Ventilation rate<br>Gill surface area<br>Haemocyanin:protein<br>Haemocyanin isoform<br>expression |
| F <sub>0</sub> to F <sub>1</sub> |                      | > One week                                                     | Fitness (brood size, egg<br>volume, developmental time<br>and size at hatching of<br>offspring)                        |
| F <sub>1</sub>                   | Juvenile             | Embryonic development and six<br>weeks post-hatching.          | O <sub>2</sub> uptake under declining<br>PO <sub>2</sub><br>Pc                                                         |
| F <sub>1</sub>                   | Adult                | Until individuals reached sexual<br>maturity (approx.3 months) | O <sub>2</sub> uptake under declining<br>PO <sub>2</sub><br>Pc                                                         |
